# Supplementary material for: The Hidden Epidemic: Unveiling Associated Injuries Among Motor Traffic Accident Victims in Southern Tanzania
Source: Research Square preprint supplement (doi:10.21203/rs.3.rs-5701767/v1), 2025-03-26
Supplement: Supplementary file 1 [file cb515038fa4382dd65d38444.pdf]

STROBE Statement—Checklist of items that should be included in reports of *cross-sectional studies*

|                              | Item No | Recommendation                                                                                                                                                                                                                                                                                                                                                                                                                                                                                |
|------------------------------|---------|-----------------------------------------------------------------------------------------------------------------------------------------------------------------------------------------------------------------------------------------------------------------------------------------------------------------------------------------------------------------------------------------------------------------------------------------------------------------------------------------------|
| <b>Title and abstract</b>    | 1       | <p>(a) Indicate the study's design with a commonly used term in the title or the abstract<br/> A cross-sectional study as stated in the Abstract on page 2 and Methods on page 5.<br/> The 'Femoral Shaft Fracture' is a commonly used term.</p> <p>(b) Provide in the abstract an informative and balanced summary of what was done and what was found<br/> Provided in the Abstract on pages 2 and 3.</p>                                                                                   |
| <b>Introduction</b>          |         |                                                                                                                                                                                                                                                                                                                                                                                                                                                                                               |
| Background/rationale         | 2       | Explain the scientific background and rationale for the investigation being reported<br>Included in the Introduction on pages 3,4 and 5.                                                                                                                                                                                                                                                                                                                                                      |
| Objectives                   | 3       | State specific objectives, including any prespecified hypotheses<br>Included in the Introduction on page 5.                                                                                                                                                                                                                                                                                                                                                                                   |
| <b>Methods</b>               |         |                                                                                                                                                                                                                                                                                                                                                                                                                                                                                               |
| Study design                 | 4       | Present key elements of study design early in the paper<br>Included in the Patients and Methods on page 5.                                                                                                                                                                                                                                                                                                                                                                                    |
| Setting                      | 5       | Describe the setting, locations, and relevant dates, including periods of recruitment, exposure, follow-up, and data collection<br>Included in the Methods on pages 5 and 6                                                                                                                                                                                                                                                                                                                   |
| Participants                 | 6       | <p>(a) Give the eligibility criteria, and the sources and methods of selection of participants<br/> Included in the Methods on page 6.</p>                                                                                                                                                                                                                                                                                                                                                    |
| Variables                    | 7       | Clearly define all outcomes, exposures, predictors, potential confounders, and effect modifiers. Give diagnostic criteria, if applicable<br>Included in the Methods on pages 8 and 9.                                                                                                                                                                                                                                                                                                         |
| Data sources/<br>measurement | 8*      | For each variable of interest, give sources of data and details of methods of assessment (measurement). Describe comparability of assessment methods if there is more than one group<br>Included in the Methods on page 9.                                                                                                                                                                                                                                                                    |
| Bias                         | 9       | Describe any efforts to address potential sources of bias<br>Addressed in the limitations in the last paragraph of the Discussion on page 21                                                                                                                                                                                                                                                                                                                                                  |
| Study size                   | 10      | Explain how the study size was arrived at<br>Included in the Methods on page 7 (sample was derived from a fixed geographical catchment area)                                                                                                                                                                                                                                                                                                                                                  |
| Quantitative variables       | 11      | Explain how quantitative variables were handled in the analyses. If applicable, describe which groupings were chosen and why<br>Included in the Methods on page 10                                                                                                                                                                                                                                                                                                                            |
| Statistical methods          | 12      | <p>(a) Describe all statistical methods, including those used to control for confounding<br/> Included in the Methods on page 10.</p> <p>(b) Describe any methods used to examine subgroups and interactions<br/> Included in the Methods on page 10.</p> <p>(c) Explain how missing data were addressed<br/> Not applicable.</p> <p>(d) If applicable, describe analytical methods taking account of sampling strategy<br/> Not applicable.</p> <p>(e) Describe any sensitivity analyses</p> |

Not applicable.

|                          |     |                                                                                                                                                                                                                                                                                                                                                                                                                                                                                                                                                                  |
|--------------------------|-----|------------------------------------------------------------------------------------------------------------------------------------------------------------------------------------------------------------------------------------------------------------------------------------------------------------------------------------------------------------------------------------------------------------------------------------------------------------------------------------------------------------------------------------------------------------------|
| <b>Results</b>           |     |                                                                                                                                                                                                                                                                                                                                                                                                                                                                                                                                                                  |
| Participants             | 13* | <p>(a) Report numbers of individuals at each stage of study—eg numbers potentially eligible, examined for eligibility, confirmed eligible, included in the study, completing follow-up, and analysed<br/><b>Included in the Methods on page 7</b></p> <p>(b) Give reasons for non-participation at each stage<br/><b>Not applicable</b></p> <p>(c) Consider use of a flow diagram<br/><b>Included in the Methods on page 7</b></p>                                                                                                                               |
| Descriptive data         | 14* | <p>(a) Give characteristics of study participants (eg demographic, clinical, social) and information on exposures and potential confounders<br/><b>Included in the Results on page 11</b></p> <p>(b) Indicate number of participants with missing data for each variable of interest<br/><b>Not applicable</b></p>                                                                                                                                                                                                                                               |
| Outcome data             | 15* | <p>Report numbers of outcome events or summary measures<br/><b>Included in the Results on page 11</b></p>                                                                                                                                                                                                                                                                                                                                                                                                                                                        |
| Main results             | 16  | <p>(a) Give unadjusted estimates and, if applicable, confounder-adjusted estimates and their precision (eg, 95% confidence interval). Make clear which confounders were adjusted for and why they were included<br/><b>Included in the Results on pages 11 to 18</b></p> <p>(b) Report category boundaries when continuous variables were categorized<br/><b>Included in the Results on pages 11 to 18</b></p> <p>(c) If relevant, consider translating estimates of relative risk into absolute risk for a meaningful time period<br/><b>Not applicable</b></p> |
| Other analyses           | 17  | <p>Report other analyses done—eg analyses of subgroups and interactions, and sensitivity analyses<br/><b>Not applicable</b></p>                                                                                                                                                                                                                                                                                                                                                                                                                                  |
| <b>Discussion</b>        |     |                                                                                                                                                                                                                                                                                                                                                                                                                                                                                                                                                                  |
| Key results              | 18  | <p>Summarise key results with reference to study objectives<br/><b>Included in the Discussion on pages 19 to 21.</b></p>                                                                                                                                                                                                                                                                                                                                                                                                                                         |
| Limitations              | 19  | <p>Discuss limitations of the study, taking into account sources of potential bias or imprecision. Discuss both direction and magnitude of any potential bias<br/><b>Included in the Discussion on page 21.</b></p>                                                                                                                                                                                                                                                                                                                                              |
| Interpretation           | 20  | <p>Give a cautious overall interpretation of results considering objectives, limitations, multiplicity of analyses, results from similar studies, and other relevant evidence<br/><b>Included in the Discussion on pages 19 to 21.</b></p>                                                                                                                                                                                                                                                                                                                       |
| Generalisability         | 21  | <p>Discuss the generalisability (external validity) of the study results<br/><b>Included in the Discussion on page 19.</b></p>                                                                                                                                                                                                                                                                                                                                                                                                                                   |
| <b>Other information</b> |     |                                                                                                                                                                                                                                                                                                                                                                                                                                                                                                                                                                  |
| Funding                  | 22  | <p>Give the source of funding and the role of the funders for the present study and, if applicable, for the original study on which the present article is based<br/><b>Provided in the text on page 23.</b></p>                                                                                                                                                                                                                                                                                                                                                 |
